# Supplementary material for: In silico Identification of 10 Hub Genes and an miRNA–mRNA Regulatory Network in Acute Kawasaki Disease
Source: Front Genet. 2021 Mar 25;12:585058. doi: 10.3389/fgene.2021.585058 (PMC8044791; doi:10.3389/fgene.2021.585058)
Supplement: Supplementary Table 3 — GO annotation and KEGG pathway enrichment analysis of DE-mRNAs. [file Table_3.xls]

## Sheet: GO and KEGG 
Category	Term	Count	%	PValue	Genes	List Total	Pop Hits	Pop Total	Fold Enrichment	Bonferroni	Benjamini	FDR
GOTERM_MF_DIRECT	GO:0003677~DNA binding	124	13.9797	7.4605e-07	MEF2C, HIST2H2AA4, ZNF823, ZNF781, RORA, HMGN5, RFXAP, DNASE1L3, HIST1H2BN, GATA6, PHTF2, ZNF107, FBXO21, PMS1, CIITA, SATB1, RXRA, ZNF507, ZNF501, POLR2J3, ZFP82, ZNF236, ZNF235, HUWE1, MTF2, MLLT10, MGA, ZNF432, ZNF438, ZC3H3, ZNF614, ZNF132, ZNF610, SSH3, ZNF229, ZNF226, ZNF225, ALB, ZNF224, ZNF223, ZNF596, ZNF124, ZNF420, TCF4, KLF6, SHPRH, KLF8, KLF9, KLF12, ARID3A, WRN, HOXB3, ETS1, EBF1, H…	809	1674	16881	1.54567	0.000678676	0.000678676	0.00116456
GOTERM_CC_DIRECT	GO:0005634~nucleus	304	34.2728	3.9126e-05	MEF2C, KIFC1, HIST2H2AA4, KIAA0556, S100A8, PPP2R5C, PGD, S100A9, ZNF781, NAA15, FSTL3, RP9, SYNCRIP, REST, RORA, HMGN5, DNASE1L3, RFXAP, HIST1H2BN, MYD88, PHTF2, ZNF107, CEP290, MAGI3, RXRA, ZNF507, ZNF501, MED12, NUDT10, PTPDC1, RETN, ZFP82, ZNF236, SPAG8, ZNF235, HUWE1, MTF2, EIF2S1, MLLT10, PARP15, MLLT11, ZNF614, PPP2R3B, ZNF132, ZNF610, NEK1, PRRC2A, AFAP1L1, ADAP1, ZNF229, HNRNPA3, ZNF226,…	844	5415	18224	1.21221	0.0199486	0.0199486	0.0565622
GOTERM_BP_DIRECT	GO:0006355~regulation of transcription, DNA-templated	107	12.0631	4.00408e-05	MEF2C, RALY, ZNF823, RBM15B, ZNF781, REST, RORA, HMGN5, USP27X, PHTF2, PSIP1, ZNF107, CIITA, MTERF1, SATB1, ZNF507, ZNF501, ZFP82, RALGAPA1, ZNF236, ZNF235, PARP15, MGA, ZNF432, ERC1, ZNF438, ZNF614, ZNF132, ZNF610, ADORA2A, ZNF229, ZNF226, ZNF225, CNOT6L, ZNF224, ZNF223, ZNF596, ZNF124, MTERF4, ZNF420, EWSR1, ZNF831, KLF8, TAF5, SMAD5, ATAD2, GAS7, SFMBT2, HOXB3, ZNF419, EBF1, ZNF112, KAT6B, E2F…	811	1504	16792	1.47305	0.115424	0.115424	0.0722425
GOTERM_MF_DIRECT	GO:0003700~transcription factor activity, sequence-specific DNA binding	74	8.34273	5.72964e-05	MEF2C, E2F1, PPARA, BACH2, ZFP14, E2F4, FOSL2, ZNF451, SPI1, TP63, RORA, REST, RFXAP, ZBTB38, GATA6, HSF2, ZNF146, HEY2, FOSL1, ZNF493, ZNF287, RXRA, ZNF354B, ZFX, ZNF501, LEF1, GTF2H3, ZFP82, ZNF235, GTF2I, MLLT10, ZNF711, MGA, ZNF432, ZNF438, BTAF1, ZNF132, SRF, ZNF175, ZNF174, ZNF229, ZNF30, STAT4, ZNF226, ZNF600, ZNF225, NR1D2, ZNF224, ZNF223, POU2F1, ZNF420, TCF4, NFATC2, ZNF831, CEBPB, KLF1…	809	961	16881	1.60679	0.0508051	0.0257337	0.0894007
GOTERM_MF_DIRECT	GO:0005515~protein binding	475	53.5513	6.23607e-05	MEF2C, TTI1, PPP2R5C, NAA15, MED25, FSTL3, SYNCRIP, RP9, REST, RORA, SHKBP1, CTGF, RPL10, RAB27A, MAGI3, PTPRM, NCF4, RXRA, ZNF501, MED12, TMEM132D, GLTP, ST13, GRB10, SPAG8, EIF2S1, TMEM139, ARL8A, ACAA1, ORAI2, ZNF614, PPP2R3B, RHPN1, GSTCD, UBA6, HSPA1A, PRRC2A, CNTRL, ADAP1, PROCR, DUSP13, ZNF224, ZNF223, ZNF124, TCF4, SPOP, KLF12, SPTSSB, GAS7, USF2, GAS6, SFMBT2, SERPINI2, TNNI2, SYNE2, UPF…	809	8785	16881	1.12824	0.0551697	0.0187389	0.097299
GOTERM_BP_DIRECT	GO:0006351~transcription, DNA-templated	131	14.7689	7.49113e-05	RALY, MEF2C, ZNF823, RBM15B, ZNF451, FSTL3, NAA15, ZNF781, FOXO1, REST, RORA, HMGN5, SMARCD3, PHTF2, PSIP1, ZNF107, SS18L1, CIITA, SATB1, RXRA, ZNF507, ZNF501, POLR2J3, ZFP82, ZNF236, ZNF235, MLLT10, PARP15, MGA, ZNF432, ZNF438, ZNF614, ZNF132, ZNF610, ZNF229, ZNF226, ZNF225, CNOT6L, ZNF224, ZNF223, ZNF596, ZNF124, ZNF420, EWSR1, KLF6, KLF8, KLF9, KLF12, SMAD5, ATAD2, TET1, HOXB3, ZNF419, EBF1, H…	811	1955	16792	1.38741	0.205039	0.108394	0.135117
GOTERM_MF_DIRECT	GO:0003676~nucleic acid binding	74	8.34273	0.000120988	RALY, SRSF1, ZNF84, ZFP14, ZNF823, RBM15B, ZNF530, U2SURP, ZNF781, SYNCRIP, RNASEH1, ZNF10, REST, ZBTB38, ZNF682, ZNF107, SYNJ2, IMPDH1, ZNF493, ZCCHC7, ZNF507, ZNF287, ZNF354B, ZFX, HLTF, HNRNPR, ZFP82, ZNF236, ZNF235, TRMT11, ZNF714, ZNF432, ZNF438, GPATCH11, ZNF485, ZNF614, ARPP21, THAP9, ZNF132, ZNF610, ZNF75A, CBLL1, ZNF175, ZNF30, ZNF229, HNRNPA3, ZNF226, ZNF225, ZNF224, ZNF223, BCL11B, BCL…	809	985	16881	1.56764	0.10426	0.027151	0.188692
GOTERM_BP_DIRECT	GO:0045944~positive regulation of transcription from RNA polymerase II promoter	73	8.22999	0.000234067	MEF2C, E2F1, PPARA, E2F4, FOSL2, FSTL3, MED25, SPI1, TP63, FOXO1, RORA, REST, FLCN, SKAP1, ZBTB38, TLR9, NLRC5, S1PR1, GATA6, HSF2, HEY2, PSIP1, POU4F1, MKL2, TNIP1, FOSL1, CIITA, MYO6, RXRA, MED12, LEF1, DLL1, HLTF, LPIN1, OSM, SPAG8, MTF2, HOXC13, ZMIZ1, MLLT10, TXK, SBNO2, NUFIP1, PRKDC, SRF, STAT4, NIPBL, BCL11B, BCL11A, PKD2, NFATC2, TCF4, CEBPB, KLF12, LMX1B, NUCKS1, ARID3A, SMYD3, AHI1, AT…	811	981	16792	1.54076	0.5118	0.212593	0.421611
GOTERM_CC_DIRECT	GO:0005654~nucleoplasm	167	18.8275	0.000246395	MEF2C, PRPF4B, KIAA0556, RBM15B, PPP2R5C, FSTL3, MED25, SYNCRIP, FOXO1, RORA, REST, HMGN5, WDR75, HIST1H2BN, GATA6, SMARCD3, PSIP1, U2AF1, ORC5, PITPNC1, CYHR1, NQO2, SCAMP1, CIITA, SATB1, MYO6, MMS22L, RXRA, MED12, HNRNPR, PTPDC1, WEE1, DCLRE1C, HUWE1, MTF2, MLLT10, MGA, ZNF438, PPP2R3B, LMNB1, PFKFB3, GSDMD, COPS7A, CCDC91, HSPA1A, CCNG1, SRF, PXN, HNRNPA3, NIPBL, PRKRA, DYRK2, ZNF420, SPOP, TA…	844	2784	18224	1.29523	0.119186	0.0614832	0.355703
GOTERM_CC_DIRECT	GO:0005622~intracellular	90	10.1466	0.000268533	ZNF84, ZFP14, ZNF823, ZNF530, RAB1B, ZNF10, FGF12, ARL11, ZNF682, RAB28, ZNF107, PITPNC1, VPS13A, TNIP1, ZNF493, NET1, RAB27A, GTPBP2, DBNL, ARHGEF3, SGK2, RAB39B, SOCS3, PIK3C2A, ZNF287, ZNF354B, ARHGAP27, PRKCH, NFAM1, MAP4K3, OSM, ZFP82, ZNF235, GRM2, RASGRF2, ZNF714, CAPN13, MLLT11, CAPN14, TOM1, ARL8A, KCNH8, SRP72, ZNF432, NKIRAS2, ZNF485, ZNF614, RAB7A, ZNF132, TBC1D9, ZNF610, CLU, RAB40C,…	844	1332	18224	1.45895	0.129174	0.0450577	0.387605
GOTERM_CC_DIRECT	GO:0000790~nuclear chromatin	20	2.25479	0.00159654	E2F1, HIST2H2AA4, HIST1H1D, CEBPB, E2F4, NACC2, NUCKS1, TTC21B, TAF5, RXRA, HIST1H2AD, SPI1, TP63, FER, SRF, STAT3, SMARCD3, POU4F1, TCF4, NFATC2	844	193	18224	2.23756	0.560833	0.185938	2.284
KEGG_PATHWAY	hsa04380:Osteoclast differentiation	15	1.69109	0.00167443	FOSL2, SOCS3, CSF1, NCF4, SPI1, SIRPA, LILRB2, LILRA2, FYN, LILRB3, LILRA5, OSCAR, NFATC2, FOSL1, BLNK	302	131	6879	2.60818	0.341166	0.341166	2.1522
GOTERM_MF_DIRECT	GO:0008017~microtubule binding	21	2.36753	0.00240132	GAS2L3, KIFC1, CCDC88A, S100A8, APC2, S100A9, KIF18A, KIF16B, FES, RGS14, HOOK1, CFAP44, SBDS, SPAG8, NDEL1, KRIT1, CAMSAP1, CDK5RAP2, JAKMIP2, MDM1, KIF13B	809	208	16881	2.10671	0.88784	0.354394	3.68335
GOTERM_BP_DIRECT	GO:2001244~positive regulation of intrinsic apoptotic signaling pathway	7	0.789177	0.00448045	BCLAF1, S100A8, PRKRA, CLU, S100A9, RIPK3, FLCN	811	33	16792	4.39203	0.999999	0.967891	7.78494
GOTERM_BP_DIRECT	GO:0045747~positive regulation of Notch signaling pathway	7	0.789177	0.00448045	SLC35C2, AAK1, TSPAN14, TP63, DLL1, RFNG, STAT3	811	33	16792	4.39203	0.999999	0.967891	7.78494
GOTERM_BP_DIRECT	GO:0043304~regulation of mast cell degranulation	4	0.450958	0.00521766	RAC2, STXBP2, FER, FES	811	8	16792	10.3527	1	0.959429	9.00967
GOTERM_MF_DIRECT	GO:0046872~metal ion binding	124	13.9797	0.00598964	SLC8A3, GNA15, ZNF823, ZNF451, ZNF781, RP9, REST, U2AF1, ZNF107, NQO2, SPON1, ZNF507, ZNF501, NUDT10, ZFP82, ZNF236, ZNF235, RFK, TESK1, ZNF432, ZNF438, ZC3H3, ZNF614, ZNF132, ZNF610, NEK1, ACP7, EXTL2, ADAP1, ZNF229, ECE1, ZNF226, ZNF225, ITGAX, CNOT6L, ZNF224, ZNF223, GALNS, ZNF596, ZNF124, ZNF420, FGD6, ADAM28, ZNF831, KLF6, ITK, KLF8, ADAL, KLF9, KLF12, UPB1, SMAD5, SMYD3, RFNG, PDE7B, ZNF419…	809	2069	16881	1.25058	0.995776	0.597943	8.9515
GOTERM_BP_DIRECT	GO:0001816~cytokine production	6	0.676437	0.00612402	ITK, S100A8, RASGRP1, S100A9, TXK, NFATC2	811	25	16792	4.96927	1	0.956541	10.4944
GOTERM_BP_DIRECT	GO:0045893~positive regulation of transcription, DNA-templated	39	4.39684	0.00620169	E2F1, MEF2C, PPARA, SPI1, NAA15, PPM1A, FOXO1, TP63, REST, RORA, HMGN5, RFXAP, SKAP1, GATA6, NR1D2, SMARCD3, CEP290, CDK5RAP2, NFATC2, TCF4, SS18L1, CIITA, KLF6, ZNF287, SMAD5, MED12, ATAD2, LEF1, CREB5, STAT3, TNNI2, ETS1, MLLT11, USP21, LRP6, ZNF711, PTCH1, IRF4, KAT6B	811	515	16792	1.56797	1	0.934266	10.6205
GOTERM_CC_DIRECT	GO:0005911~cell-cell junction	17	1.91657	0.00622882	ITK, HPN, MAGI3, PTPRM, COL13A1, FLOT1, NECTIN2, PRKCH, AHI1, SKAP1, LIN7A, KRIT1, PKD2, CD2, LIMD1, CEACAM1, DLG1	844	172	18224	2.13413	0.95996	0.474589	8.63905
GOTERM_CC_DIRECT	GO:0044291~cell-cell contact zone	5	0.563698	0.00667601	FLOT2, FGFRL1, FLOT1, NECTIN2, FLCN	844	17	18224	6.35071	0.968244	0.437264	9.23174
GOTERM_BP_DIRECT	GO:0042110~T cell activation	8	0.901917	0.00690616	ITK, CD3G, FYN, CD2, TREML2, IRF4, DLG1, KIF13B	811	47	16792	3.52431	1	0.929586	11.7572
GOTERM_BP_DIRECT	GO:0051453~regulation of intracellular pH	7	0.789177	0.00697188	SLC9A8, SLC9A6, SLC26A8, SLC4A7, SLC4A2, SLC4A4, SLC9A1	811	36	16792	4.02603	1	0.907549	11.8625
GOTERM_CC_DIRECT	GO:0030027~lamellipodium	16	1.80383	0.0073949	DBNL, CCDC88A, PTPRM, FLOT2, FLOT1, FER, PXN, RUFY3, CORO1B, DYSF, TSC1, RAC2, PKD2, APBB2, FGD6, SLC9A1	844	160	18224	2.15924	0.978127	0.420781	10.177
GOTERM_CC_DIRECT	GO:0005874~microtubule	25	2.81849	0.010117	SLC8A3, DNAH11, GAS2L3, KIFC1, HAUS3, APC2, DNAH17, DNAH8, TUBGCP4, HOOK1, SPRY2, EIF3A, CAMSAP1, CDK5RAP2, KIF13B, DLG1, RMDN2, KIF18A, KIF16B, LRRC49, RGS14, NDEL1, KRIT1, MAP7, MDM1	844	311	18224	1.73572	0.994683	0.480348	13.674
GOTERM_MF_DIRECT	GO:0015299~solute:proton antiporter activity	4	0.450958	0.0101807	SLC9A6, SLC9B1, SLC9B2, SLC9A1	809	10	16881	8.3466	0.99991	0.735594	14.7628
GOTERM_BP_DIRECT	GO:0055088~lipid homeostasis	7	0.789177	0.0103374	ACADSB, NR1D2, CETP, PNPLA2, PNPLA4, USF2, ABCB4	811	39	16792	3.71634	1	0.958531	17.1008
GOTERM_CC_DIRECT	GO:0005737~cytoplasm	273	30.7779	0.0105398	MEF2C, TTI1, DZIP3, KIAA0556, SCN3A, NAA15, RP9, RNASEH1, HIST1H2BN, MYD88, RAB28, CEP290, SDR9C7, PLS3, KIF13B, DBNL, PTPRM, LRRC1, NUDT10, RIC8B, PTPDC1, RSPH9, GLTP, ST13, LILRB2, GRB10, SPAG8, HUWE1, MTF2, EIF2S1, MLLT10, MLLT11, ARL8A, LRCH3, SRP72, DNAH11, SLC2A10, DNAH17, NEK1, GSTCD, UBA6, HSPA1A, PRRC2A, CNTRL, AFAP1L1, PXN, ADAP1, HNRNPA3, KRT28, RAC2, DUSP13, FBXO6, MTERF4, CDC42EP3, B…	844	5222	18224	1.12883	0.995733	0.454641	14.2056
GOTERM_MF_DIRECT	GO:0000977~RNA polymerase II regulatory region sequence-specific DNA binding	19	2.14205	0.0112026	MEF2C, SATB1, CEBPB, LMX1B, KLF12, RXRA, ARID5B, ZFX, ARID3A, LEF1, ARHGAP35, RORA, STAT4, ZNF419, HSF2, GATA6, ZNF711, IRF2, CUX2	809	208	16881	1.90607	0.999965	0.722375	16.1261
GOTERM_CC_DIRECT	GO:0000786~nucleosome	11	1.24014	0.0115309	HIST2H2AA4, HIST1H2BC, HIST1H2BN, SHPRH, HIST1H1D, HIST1H2BE, HIST2H2BE, HIST1H2AD, HIST1H3D, KAT6B, HIST1H3G	844	94	18224	2.52677	0.997453	0.4497	15.44
GOTERM_BP_DIRECT	GO:0006895~Golgi to endosome transport	5	0.563698	0.0116618	SORT1, VPS13A, KIF16B, KLHL20, MON2	811	19	16792	5.44876	1	0.961855	19.0803
GOTERM_CC_DIRECT	GO:0070062~extracellular exosome	155	17.4746	0.0117674	TSPO, HIST2H2AA4, S100A8, FAM20A, MMP9, S100A9, PGD, PGLYRP1, RAB1B, VPS50, TTN, HIST1H2BN, SLC2A5, DYSF, LILRA5, OSCAR, SLC4A4, NQO2, RAB27A, DBNL, SLC12A9, MYO6, PATJ, SIRPA, GLTP, ST13, RETN, HUWE1, EIF2S1, ST14, ARL8A, SLC38A1, RAB7A, ACADSB, FGR, CLU, GSTCD, PRRC2A, ARPC4, EPHA10, EXTL2, SERINC2, KRT28, ECE1, NIPBL, PROCR, RAC2, ALB, GALNS, ENTPD6, RPL7A, ZNF420, ARHGDIA, MOCS2, CCDC25, UPB1…	844	2811	18224	1.19062	0.997748	0.425465	15.732
GOTERM_BP_DIRECT	GO:0003006~developmental process involved in reproduction	3	0.338219	0.013066	ALPL, CSF1, CYSTM1	811	4	16792	15.529	1	0.965163	21.1304
GOTERM_BP_DIRECT	GO:0060325~face morphogenesis	6	0.676437	0.0134728	NIPBL, CRISPLD2, CSRNP1, ARID5B, LRP6, LEF1	811	30	16792	4.14106	1	0.959073	21.7151
GOTERM_CC_DIRECT	GO:0000788~nuclear nucleosome	7	0.789177	0.0151555	HIST1H2BC, HIST1H2BN, HIST1H2BE, HIST2H2BE, HIST1H3D, IRF4, HIST1H3G	844	44	18224	3.43516	0.999616	0.480767	19.8147
GOTERM_BP_DIRECT	GO:0006366~transcription from RNA polymerase II promoter	37	4.17136	0.0156985	MEF2C, BACH2, E2F4, SPI1, TP63, REST, SRF, HSF2, GATA6, BCL11B, TCEA1, POU4F1, NFATC2, FOSL1, ZNF831, TAF3, CEBPB, NUCKS1, TAF5, ARID3A, GTF2H3, LEF1, CREB5, HLTF, USF2, POLR2J3, MNAT1, GTF2I, ETS1, HOXC13, CSRNP1, ZNF136, EBF1, SUPT16H, IRF2, TXK, IRF4	811	513	16792	1.49336	1	0.968628	24.8422
GOTERM_BP_DIRECT	GO:0007507~heart development	17	1.91657	0.0158052	MEF2C, DNAH11, PPARA, ALPK3, AP1B1, RBM20, MED12, PRKDC, FGF12, SRF, ECE1, OXCT1, PKD2, HOPX, MOSPD3, MTERF4, PCSK5	811	183	16792	1.92344	1	0.96135	24.9892
GOTERM_BP_DIRECT	GO:0030155~regulation of cell adhesion	7	0.789177	0.0164281	S1PR1, LMO7, DLL1, CBLL1, FES, SRF, SERPINI2	811	43	16792	3.37063	1	0.958042	25.8414
GOTERM_MF_DIRECT	GO:0015385~sodium:proton antiporter activity	4	0.450958	0.0173772	SLC9A8, SLC9A6, SLC9B1, SLC9A1	809	12	16881	6.9555	1	0.830088	23.9393
GOTERM_MF_DIRECT	GO:0000979~RNA polymerase II core promoter sequence-specific DNA binding	8	0.901917	0.0184978	HOXB3, NLRC5, CEBPB, HSF2, GATA6, SMAD5, SMYD3, SPI1	809	57	16881	2.92863	1	0.817146	25.2821
GOTERM_MF_DIRECT	GO:0001077~transcriptional activator activity, RNA polymerase II core promoter proximal region sequence-specific binding	20	2.25479	0.0189683	MEF2C, PPARA, E2F4, CEBPB, NUCKS1, SPI1, LEF1, TP63, HLTF, SRF, STAT3, HOXC13, BCL11B, EBF1, TXK, POU4F1, IRF4, TCF4, NFATC2, FOSL1	809	236	16881	1.76835	1	0.794902	25.8391
GOTERM_CC_DIRECT	GO:0005769~early endosome	19	2.14205	0.0200993	DBNL, KIFC1, PARM1, RAP1GAP, FLOT1, ACKR3, EEA1, NIPA1, KIF16B, NUCB1, RAB31, ECE1, DYSF, RABEP1, LRP6, SORT1, TOM1, EHD1, RIN3	844	229	18224	1.79151	0.999971	0.552622	25.4426
GOTERM_BP_DIRECT	GO:0070373~negative regulation of ERK1 and ERK2 cascade	8	0.901917	0.0209757	SPRY2, NLRP6, SPRY1, EIF3A, FLCN, TNIP1, RGS14, DLG1	811	58	16792	2.8559	1	0.978062	31.7917
GOTERM_BP_DIRECT	GO:0070201~regulation of establishment of protein localization	3	0.338219	0.0210837	EPB41L5, CEP290, KIAA0586	811	5	16792	12.4232	1	0.97338	31.9274
GOTERM_BP_DIRECT	GO:0033153~T cell receptor V(D)J recombination	3	0.338219	0.0210837	BCL11B, LEF1, PRKDC	811	5	16792	12.4232	1	0.97338	31.9274
GOTERM_CC_DIRECT	GO:0005794~Golgi apparatus	54	6.08794	0.0214139	SLC9A8, FAM3C, FAM20A, FGFRL1, FSTL3, RAB1B, FES, SPRY1, ST3GAL5, CTGF, ATP8B2, CDK5RAP2, JAKMIP2, KLHL20, RAB27A, DLG1, PARM1, MYO6, CCDC88A, RAB39B, PIK3C2A, BICD1, LRPAP1, NUCB1, LAX1, ZDHHC12, SORT1, DDX31, CA4, CAND1, GALNT2, RAB7A, APC2, FUT7, CLU, ST8SIA1, AKAP9, CCDC91, P3H2, COL26A1, GNPTAB, ALB, RASGRP1, PLIN3, FUT2, PCSK5, FGD6, SECTM1, ARID3A, GOLGA6L9, SLC35C2, GRINA, LRP6, PTCH1	844	863	18224	1.35109	0.999986	0.548998	26.8761
GOTERM_MF_DIRECT	GO:0004715~non-membrane spanning protein tyrosine kinase activity	7	0.789177	0.0216205	ITK, FGR, FYN, TXK, FER, FES, WEE1	809	46	16881	3.17534	1	0.809392	28.9078
GOTERM_BP_DIRECT	GO:0051145~smooth muscle cell differentiation	4	0.450958	0.0222512	MEF2C, GATA6, HEY2, MKL2	811	13	16792	6.37086	1	0.973421	33.3779
GOTERM_BP_DIRECT	GO:0001932~regulation of protein phosphorylation	6	0.676437	0.0224732	CCDC88A, CCDC88C, SOCS3, ARR3, FER, FLCN	811	34	16792	3.65388	1	0.969224	33.6504
GOTERM_CC_DIRECT	GO:0016020~membrane	122	13.7542	0.0227656	KIFC1, PPP1R21, NAA15, SYNCRIP, VPS50, WNK4, CEP290, RPL10, SLC4A2, RECK, MAGI3, SLC12A9, MYO6, CD3G, NCF4, LRRC1, MED12, PNPLA2, PNPLA4, SIRPA, NKTR, PNPLA6, BICD1, TACC1, POR, GLTP, LILRB2, SPAG8, CD163L1, HUWE1, LRP10, EIF2S1, ARL8A, ACAA1, ORAI2, LMNB1, ADORA2A, PRRC2A, CCDC91, CNTRL, SORCS3, EIF3A, ECE1, ERO1A, ITGAX, RAC2, PRKRA, APOBR, EIF3F, RPL7A, NIPA1, RFNG, ABCB4, APOL2, PLEKHA5, TSC1…	844	2200	18224	1.1974	0.999993	0.546451	28.3231
KEGG_PATHWAY	hsa04360:Axon guidance	12	1.35287	0.0228744	SEMA6B, RAC2, LIMK2, FYN, RGS3, LIMK1, CFL2, NTNG2, SEMA3B, FES, NFATC2, SLIT3	302	127	6879	2.15227	0.996855	0.943918	25.9495
GOTERM_CC_DIRECT	GO:0005829~cytosol	177	19.9549	0.0234785	MEF2C, GNPDA2, S100A8, PPP2R5C, CEP78, S100A9, PGD, FOXO1, REST, TTN, LZTFL1, HOOK1, NLRC5, USP27X, MYD88, OPLAH, CTGF, WNK4, COQ8B, EIF1AX, PSIP1, CEP290, RPL10, VPS13A, NET1, KIF13B, DBNL, MYO6, CEP89, SOCS3, NCF4, NUDT10, PNPLA2, RIC8B, PNPLA4, TAT, GLTP, BICD1, ST13, GRB10, NDEL1, HUWE1, RASGRF2, RFK, EIF2S1, RIPK3, TESK1, SRP72, RAB7A, EIF4E3, FGR, PFKFB3, RHPN1, CLU, GSDMD, PFKFB1, UBA6, HS…	844	3315	18224	1.1529	0.999995	0.53454	29.0755
GOTERM_BP_DIRECT	GO:0002250~adaptive immune response	14	1.57835	0.0268628	ITK, GPR183, DBNL, SKAP1, DCLRE1C, LILRB2, LILRA2, TSC1, LAX1, FYN, LILRB3, FCGR1B, TXK, ERAP2	811	148	16792	1.95861	1	0.981159	38.8268
GOTERM_BP_DIRECT	GO:0051092~positive regulation of NF-kappaB transcription factor activity	13	1.46561	0.0272101	RPS6KA5, MYD88, S100A8, S100A9, CLU, RIPK3, PRKCH, MALT1, HSPA1A, FER, ERC1, S100A12, TLR9	811	133	16792	2.02383	1	0.978525	39.2197
GOTERM_MF_DIRECT	GO:0008270~zinc ion binding	71	8.00451	0.0300594	BMI1, ZNF84, PPARA, SEC24B, S100A8, DZIP3, MMP9, S100A9, PGLYRP1, LMO7, ANPEP, RORA, APOBEC3C, APOBEC3B, TP53I3, GATA6, TRIM7, SETMAR, ZNF146, ERAP2, MICAL1, CYHR1, ZCCHC7, PHC2, ASTL, LIMK2, LIMK1, RXRA, DNAJC21, HLTF, ZSWIM2, MMP14, ADAMTS8, MTF2, MLLT10, ZMIZ1, ZDHHC12, RNF24, CA4, ADAMTS2, XIAP, EEA1, CBLL1, PXN, MYCBP2, RNF166, NR1D2, RASGRP1, CDA, TCEA1, LIMD1, EWSR1, LRSAM1, TAF3, SHPRH, L…	809	1169	16881	1.26734	1	0.881924	37.8995
GOTERM_BP_DIRECT	GO:0030091~protein repair	3	0.338219	0.0306235	TXN, MSRB1, MSRB3	811	6	16792	10.3527	1	0.984109	42.9559
GOTERM_BP_DIRECT	GO:0007202~activation of phospholipase C activity	5	0.563698	0.0344955	ITK, GNA15, RASGRP4, LPAR2, TXK	811	26	16792	3.98179	1	0.988669	46.9312
GOTERM_MF_DIRECT	GO:0001103~RNA polymerase II repressing transcription factor binding	5	0.563698	0.0380664	BBS2, PPARA, GATA6, STAT3, RBBP8	809	27	16881	3.86417	1	0.919753	45.4369
GOTERM_BP_DIRECT	GO:0008360~regulation of cell shape	13	1.46561	0.0382917	CDC7, HPN, EPS8, FGR, FYN, ITGA7, ARHGAP35, LIMD1, FES, CDC42EP3, FGD6, ARHGDIA, DLG1	811	140	16792	1.92264	1	0.991635	50.5735
GOTERM_CC_DIRECT	GO:0019013~viral nucleocapsid	5	0.563698	0.0384888	HNRNPA3, HNRNPUL1, SYNCRIP, HNRNPDL, HNRNPR	844	28	18224	3.85579	1	0.695479	43.3088
GOTERM_BP_DIRECT	GO:0016477~cell migration	15	1.69109	0.0389542	CCDC88A, FGR, APC2, ARHGAP35, GAS6, CORO1B, S1PR1, NDEL1, CTGF, FYN, TGFBR3, LIMD1, NFATC2, CEACAM1, SLC9A1	811	172	16792	1.80569	1	0.990729	51.1845
GOTERM_CC_DIRECT	GO:0005856~cytoskeleton	26	2.93123	0.0389856	GAS2L3, S100A8, KIAA0556, FGR, SSH3, S100A9, AKAP9, FER, PXN, SPRY2, KLHL5, SYNJ2, CDK5RAP2, FGD6, ARHGDIA, TTC21B, PTPN4, COTL1, BICD1, CABYR, S100A12, STOM, TSC1, KRIT1, EPB41L5, OSBPL10	844	371	18224	1.51322	1	0.67946	43.7309
GOTERM_BP_DIRECT	GO:0031297~replication fork processing	5	0.563698	0.039	MMS22L, NUCKS1, SETMAR, WRN, BOD1L1	811	27	16792	3.83432	1	0.989034	51.2265
GOTERM_MF_DIRECT	GO:0004674~protein serine/threonine kinase activity	27	3.04397	0.0391949	BCKDK, PRPF4B, STK38, SNX15, FAM20A, NEK1, PRKDC, TTN, AAK1, COQ8B, WNK4, CAMK2D, MASTL, DYRK2, CDC7, SGK2, ALPK3, LIMK2, TRPM7, LIMK1, PRKCH, NEK11, RPS6KA5, MAP4K3, ARAF, RIPK3, TESK1	809	376	16881	1.49839	1	0.911582	46.4276
GOTERM_MF_DIRECT	GO:0000014~single-stranded DNA endodeoxyribonuclease activity	3	0.338219	0.0409323	DCLRE1C, SETMAR, RBBP8	809	7	16881	8.94279	1	0.907172	47.9199
KEGG_PATHWAY	hsa04810:Regulation of actin cytoskeleton	16	1.80383	0.0417604	APC2, LIMK2, LIMK1, SSH3, PIP5K1C, ARHGAP35, ARPC4, FGF12, PXN, ITGAX, RAC2, CHRM2, CFL2, ARAF, ITGA7, SLC9A1	302	210	6879	1.73548	0.999976	0.971003	42.5245
GOTERM_BP_DIRECT	GO:0007169~transmembrane receptor protein tyrosine kinase signaling pathway	10	1.1274	0.0419461	ITK, DOK1, FGR, FYN, RASGRP4, CSF1, AHI1, TXK, BLNK, PILRA	811	96	16792	2.1568	1	0.990791	53.8557
GOTERM_BP_DIRECT	GO:0051262~protein tetramerization	6	0.676437	0.0420371	TRPM3, KCNC1, SHMT1, TRPM7, AASS, TP63	811	40	16792	3.1058	1	0.989284	53.9348
GOTERM_BP_DIRECT	GO:0038083~peptidyl-tyrosine autophosphorylation	6	0.676437	0.0420371	ITK, FGR, FYN, TXK, FER, FES	811	40	16792	3.1058	1	0.989284	53.9348
GOTERM_CC_DIRECT	GO:0005801~cis-Golgi network	6	0.676437	0.0433129	SLC35C2, NUCB1, LIMK2, CTGF, AKAP9, LRPAP1	844	42	18224	3.08463	1	0.698864	47.2858
GOTERM_BP_DIRECT	GO:0010259~multicellular organism aging	4	0.450958	0.0458798	TP63, WRN, CTSV, SEC63	811	17	16792	4.87184	1	0.991731	57.1582
GOTERM_BP_DIRECT	GO:0044255~cellular lipid metabolic process	6	0.676437	0.046051	CHD9, PPARA, FAM135A, SMARCD3, RXRA, PNPLA4	811	41	16792	3.03004	1	0.990517	57.2967
GOTERM_BP_DIRECT	GO:0048008~platelet-derived growth factor receptor signaling pathway	5	0.563698	0.048967	PIK3C2A, CSRNP1, ARID5B, FER, RGS14	811	29	16792	3.56988	1	0.991817	59.5922
GOTERM_MF_DIRECT	GO:0035091~phosphatidylinositol binding	9	1.01466	0.0503951	CCDC88A, SNX15, PIK3C2A, NCF4, PITPNC1, KIF16B, FES, ITPR1, SNX20	809	85	16881	2.20939	1	0.937211	55.3881
GOTERM_BP_DIRECT	GO:0043066~negative regulation of apoptotic process	31	3.49493	0.0516627	IER3, XIAP, FIGNL1, MMP9, NAA15, FOXO1, PRKDC, TP63, HMGN5, SPRY2, MYD88, GATA6, ALB, BCL11B, KLHL20, ARHGDIA, HPN, SOCS3, BCL2A1, AHI1, LEF1, MALT1, GAS6, STAT3, MNAT1, SON, CD59, ARAF, NAIP, APBB2, SLC9A1	811	455	16792	1.41069	1	0.992727	61.6102
GOTERM_CC_DIRECT	GO:0005815~microtubule organizing center	13	1.46561	0.0518272	TRIOBP, KIFC1, BOD1, ERCC6L2, FLOT1, KIF18A, TACC1, TUBGCP4, BBS2, UPF3B, MLLT11, RAB11B, CDK5RAP2	844	153	18224	1.83465	1	0.745988	53.678
GOTERM_BP_DIRECT	GO:0007264~small GTPase mediated signal transduction	19	2.14205	0.0519739	RAB7A, RAB39B, RAB40C, RAB1B, ARHGAP35, RAB40AL, DNAJC27, ARL11, RAB31, RAC2, RASGRF2, RASGRP3, RASGRP4, RAB28, KRIT1, RAB11B, ARL8A, NKIRAS2, RAB27A	811	246	16792	1.59919	1	0.991838	61.8369
GOTERM_CC_DIRECT	GO:0015630~microtubule cytoskeleton	12	1.35287	0.0530945	TUBGCP4, NUCB1, CDC7, GAS2L3, HAUS3, APC2, KIF18A, MAP7, FER, FES, TACC1, USP44	844	137	18224	1.89131	1	0.737609	54.5653
GOTERM_BP_DIRECT	GO:0031668~cellular response to extracellular stimulus	4	0.450958	0.0531428	GSDMD, ADNP, ARHGAP35, FOSL1	811	18	16792	4.60118	1	0.991595	62.6773
GOTERM_BP_DIRECT	GO:0045022~early endosome to late endosome transport	4	0.450958	0.0531428	HOOK1, RAB7A, EEA1, KIF16B	811	18	16792	4.60118	1	0.991595	62.6773
GOTERM_BP_DIRECT	GO:0045773~positive regulation of axon extension	5	0.563698	0.0544277	NDEL1, LIMK1, ADNP, SRF, RUFY3	811	30	16792	3.45088	1	0.991449	63.5809
GOTERM_MF_DIRECT	GO:0008134~transcription factor binding	21	2.36753	0.055218	E2F1, PPARA, E2F4, CEBPB, NUCKS1, MED25, LEF1, PRKDC, RORA, REST, SRF, STAT3, ETS1, GATA6, SMARCD3, HEY2, PSMD4, IRF4, APBB2, NFATC2, KAT6B	809	284	16881	1.54295	1	0.943392	58.7966
GOTERM_MF_DIRECT	GO:0042826~histone deacetylase binding	10	1.1274	0.0555026	MEF2C, DACT1, NIPBL, NACC2, CEBPB, HEY2, LEF1, HSPA1A, SRF, BRMS1L	809	102	16881	2.04574	1	0.9351	58.99
GOTERM_CC_DIRECT	GO:0042995~cell projection	8	0.901917	0.0580551	CFAP36, CFAP44, PPP1R16B, KIAA0556, GTF2I, NPHS1, ARPC4, FER	844	75	18224	2.30319	1	0.753418	57.8883
GOTERM_BP_DIRECT	GO:0009083~branched-chain amino acid catabolic process	4	0.450958	0.0609205	ACADSB, BCKDK, PPM1K, BCKDHB	811	19	16792	4.35901	1	0.994502	67.8396
GOTERM_BP_DIRECT	GO:0006334~nucleosome assembly	11	1.24014	0.0617162	HIST1H2BC, HIST1H2BN, SHPRH, HIST1H1D, HIST1H2BE, HIST2H2BE, NAA60, SMYD3, HIST1H3D, KAT6B, HIST1H3G	811	119	16792	1.91394	1	0.994112	68.3279
GOTERM_CC_DIRECT	GO:0043231~intracellular membrane-bounded organelle	35	3.94589	0.0619878	MEF2C, RAB7A, BTAF1, TSPO, SLC9A6, SNX15, AASS, PRRC2A, AKAP9, PEX3, HMGN5, RIC3, ERO1A, CTGF, PLIN3, POU2F1, ABCD2, UGT8, SCAMP1, GTPBP2, PARM1, TAF5, ACKR3, SUN1, CYP1A2, POR, USF2, SFMBT2, AGTRAP, RABEP1, ZMIZ1, DDX31, PTCH1, CROT, ACAA1	844	558	18224	1.35436	1	0.761377	60.3605
GOTERM_CC_DIRECT	GO:0000151~ubiquitin ligase complex	10	1.1274	0.0626359	BMI1, MED12, LMO7, HSPA1A, CAND1, CBLL1, DYRK2, FBXO21, DCUN1D4, FBXO8	844	108	18224	1.9993	1	0.750426	60.7548
GOTERM_BP_DIRECT	GO:0006367~transcription initiation from RNA polymerase II promoter	13	1.46561	0.0640521	PPARA, MNAT1, TAF3, GTF2I, NR1D2, TAF5, CTGF, RXRA, MED12, MED25, GTF2H3, RORA, TCF4	811	152	16792	1.77085	1	0.994477	69.7212
GOTERM_CC_DIRECT	GO:0005925~focal adhesion	26	2.93123	0.0657391	TRIOBP, LMO7, PIP5K1C, HSPA1A, FES, PXN, PROCR, RAC2, MDC1, LIMD1, SLC4A2, RPL7A, LIMK1, FLOT2, FLOT1, PPFIBP1, NECTIN2, MMP14, CAPN1, CORO1B, SYNE2, CCND3, CD59, EPB41L5, IRF2, SLC9A1	844	391	18224	1.43581	1	0.753598	62.5922
GOTERM_BP_DIRECT	GO:0097267~omega-hydroxylase P450 pathway	3	0.338219	0.0667848	CYP2U1, CYP2C8, CYP1A2	811	9	16792	6.90177	1	0.994972	71.2777
GOTERM_BP_DIRECT	GO:0032000~positive regulation of fatty acid beta-oxidation	3	0.338219	0.0667848	PPARA, PLIN5, ABCD2	811	9	16792	6.90177	1	0.994972	71.2777
GOTERM_BP_DIRECT	GO:0035988~chondrocyte proliferation	3	0.338219	0.0667848	CTGF, MUSTN1, MMP14	811	9	16792	6.90177	1	0.994972	71.2777
GOTERM_BP_DIRECT	GO:0010629~negative regulation of gene expression	12	1.35287	0.0673322	SLC35C2, MEF2C, BBS2, FYN, CTGF, FLOT2, HEY2, ADNP, REST, FLCN, SFMBT2, SLIT3	811	137	16792	1.8136	1	0.994525	71.5803
GOTERM_BP_DIRECT	GO:0071805~potassium ion transmembrane transport	11	1.24014	0.067503	KCNC1, SLC9A8, HPN, SLC12A9, SLC9A6, PKD2, TMEM38A, KCNH8, REST, KCNG4, SLC9A1	811	121	16792	1.8823	1	0.993885	71.6741
GOTERM_CC_DIRECT	GO:0048471~perinuclear region of cytoplasm	38	4.2841	0.0691876	SLC8A3, GALNT2, SEC24B, SLC2A10, APC2, CSF1, CLU, RAB40C, HSPA1A, TNFRSF1B, PPP1R16B, ECE1, RASGRP3, CTGF, PRKRA, CAMK2D, CDK5RAP2, EHD1, CYHR1, KLHL20, DLG1, MYO6, PTPRM, FLOT2, ACKR3, MALT1, TPD52L2, PATJ, BICD1, STOM, DOK1, CORO1B, TSC1, SORT1, CA4, MAP7, PTCH1, SLC9A1	844	621	18224	1.32128	1	0.758325	64.54
KEGG_PATHWAY	hsa04115:p53 signaling pathway	7	0.789177	0.0717537	CCNB3, TP53I3, CCND3, CD82, GADD45G, GADD45B, CCNG1	302	67	6879	2.37981	1	0.990294	61.9654
GOTERM_BP_DIRECT	GO:0060021~palate development	8	0.901917	0.0734105	MEF2C, GABRB3, CSRNP1, ARID5B, LRP6, TGFBR3, LEF1, COL11A2	811	76	16792	2.17951	1	0.995622	74.7437
GOTERM_MF_DIRECT	GO:0000166~nucleotide binding	24	2.70575	0.0750265	SRSF1, RALY, MOCS2, APLF, RBM20, RBM15B, U2SURP, SYNCRIP, PABPC1L2B, HNRNPDL, HNRNPR, HNRNPA3, UPF3B, LARP4, LTB4R, U2AF1, RBMS3, ORC5, RBMXL1, SYNJ2, DAZL, IMPDH1, RBM25, EWSR1	809	348	16881	1.43907	1	0.971234	70.4003
GOTERM_CC_DIRECT	GO:0005913~cell-cell adherens junction	22	2.48027	0.0751272	COBLL1, DBNL, MYO6, PTPRM, STK38, FLOT2, FLOT1, S100A11, PPFIBP1, NECTIN2, LMO7, HSPA1A, CORO1B, PLIN3, RAB11B, HIST1H3D, MKL2, RPL7A, ERC1, EHD1, HIST1H3G, DLG1	844	323	18224	1.47069	1	0.774552	67.6751
GOTERM_MF_DIRECT	GO:0035255~ionotropic glutamate receptor binding	4	0.450958	0.0765318	FLOT2, FLOT1, CACNG2, DLG1	809	21	16881	3.97457	1	0.968259	71.1434
GOTERM_BP_DIRECT	GO:0001843~neural tube closure	8	0.901917	0.0775711	SEC24B, TSC1, ST14, LRP6, MED12, ARHGAP35, PTCH1, SETD2	811	77	16792	2.1512	1	0.996379	76.714
GOTERM_BP_DIRECT	GO:0032402~melanosome transport	4	0.450958	0.0779464	BBS2, BLOC1S5, RAB11B, RAB27A	811	21	16792	3.94387	1	0.996009	76.8844
GOTERM_BP_DIRECT	GO:0000132~establishment of mitotic spindle orientation	4	0.450958	0.0779464	SPRY2, SPRY1, NDEL1, CDK5RAP2	811	21	16792	3.94387	1	0.996009	76.8844
GOTERM_CC_DIRECT	GO:0031410~cytoplasmic vesicle	17	1.91657	0.0796709	CCDC88A, MYO6, SLC9A6, FLOT2, FLOT1, EEA1, DLL1, FES, MMP14, BICD1, ARRDC1, LRP6, SORT1, SLC4A7, CEP290, USP14, RIN3	844	235	18224	1.562	1	0.782824	69.8971
GOTERM_MF_DIRECT	GO:0001223~transcription coactivator binding	3	0.338219	0.079794	PPARA, FOXO1, RORA	809	10	16881	6.25995	1	0.967926	72.6942
GOTERM_CC_DIRECT	GO:0005912~adherens junction	6	0.676437	0.0802375	CD96, EPB41L5, AHI1, DLL1, LIMD1, CEACAM1	844	50	18224	2.59109	1	0.773572	70.164
KEGG_PATHWAY	hsa04662:B cell receptor signaling pathway	7	0.789177	0.0802985	CR2, RAC2, RASGRP3, CD22, MALT1, NFATC2, BLNK	302	69	6879	2.31083	1	0.984526	66.2685
GOTERM_BP_DIRECT	GO:0060674~placenta blood vessel development	3	0.338219	0.080881	SOCS3, PKD2, FOSL1	811	10	16792	6.21159	1	0.996361	78.1768
GOTERM_BP_DIRECT	GO:0060252~positive regulation of glial cell proliferation	3	0.338219	0.080881	UFL1, TSPO, PRKCH	811	10	16792	6.21159	1	0.996361	78.1768
GOTERM_BP_DIRECT	GO:0006979~response to oxidative stress	10	1.1274	0.0840784	MICB, SGK2, PSIP1, MSRB1, WRN, MMP14, TAT, RGS14, TRPM2, MSRB3	811	110	16792	1.8823	1	0.996732	79.5071
GOTERM_MF_DIRECT	GO:0001228~transcriptional activator activity, RNA polymerase II transcription regulatory region sequence-specific binding	9	1.01466	0.0848363	HSF2, GATA6, CSRNP1, ARID3A, LEF1, IRF2, REST, SRF, STAT3	809	95	16881	1.97683	1	0.97003	74.9385
KEGG_PATHWAY	hsa04640:Hematopoietic cell lineage	8	0.901917	0.0855912	CD3G, CR2, CD59, CSF1, CD2, CD22, CSF3R, ANPEP	302	87	6879	2.09454	1	0.975604	68.7035
GOTERM_BP_DIRECT	GO:0000122~negative regulation of transcription from RNA polymerase II promoter	44	4.96054	0.086023	E2F1, BMI1, MEF2C, PPARA, BACH2, SPI1, PPM1A, MED25, TP63, FOXO1, ARHGAP35, REST, FLCN, ZNF174, NIPBL, GATA6, BCL11A, HEY2, POU4F1, NFATC2, TCF4, BRMS1L, DLG1, CIITA, SATB1, TAF3, HIST1H1D, KLF12, ARID5B, RXRA, LEF1, RBBP7, STAT3, RBBP8, HOXB3, DACT1, PHF14, MTF2, ZNF136, TXN, HOPX, IRF2, PTCH1, CUX2	811	720	16792	1.26532	1	0.996785	80.2783
GOTERM_BP_DIRECT	GO:0034113~heterotypic cell-cell adhesion	4	0.450958	0.0871537	LILRB2, ITGAX, ITGA7, CD2	811	22	16792	3.7646	1	0.996655	80.7141
GOTERM_BP_DIRECT	GO:0060045~positive regulation of cardiac muscle cell proliferation	4	0.450958	0.0871537	MEF2C, GATA6, HEY2, TGFBR3	811	22	16792	3.7646	1	0.996655	80.7141
GOTERM_BP_DIRECT	GO:0030574~collagen catabolic process	7	0.789177	0.0874942	COL26A1, COL19A1, COL13A1, MMP9, MMP14, COL11A2, ADAMTS2	811	64	16792	2.26464	1	0.996335	80.8435
GOTERM_MF_DIRECT	GO:0000978~RNA polymerase II core promoter proximal region sequence-specific DNA binding	24	2.70575	0.0875217	MEF2C, PPARA, FOSL2, E2F4, NACC2, CEBPB, SPI1, LEF1, HLTF, SRF, STAT3, ZNF682, ZNF727, ZNF714, BCL11B, ZNF680, ZNF736, BCL11A, TXK, CUX2, IRF4, TCF4, NFATC2, FOSL1	809	355	16881	1.41069	1	0.968971	76.0622
GOTERM_MF_DIRECT	GO:0004843~thiol-dependent ubiquitin-specific protease activity	8	0.901917	0.0880622	OTUD3, SHMT1, USP27X, EIF3F, USP21, TNIP1, USP14, USP44	809	80	16881	2.08665	1	0.965107	76.2826
GOTERM_CC_DIRECT	GO:0001931~uropod	3	0.338219	0.089138	FLOT2, FLOT1, PIP5K1C	844	11	18224	5.88884	1	0.798657	74.0777
GOTERM_CC_DIRECT	GO:0043614~multi-eIF complex	2	0.225479	0.090378	EIF3A, EIF2S1	844	2	18224	21.5924	1	0.792718	74.5833
GOTERM_MF_DIRECT	GO:0004879~RNA polymerase II transcription factor activity, ligand-activated sequence-specific DNA binding	5	0.563698	0.0916308	PPARA, NR1D2, RXRA, RORA, STAT3	809	36	16881	2.89813	1	0.965391	77.6907
GOTERM_BP_DIRECT	GO:0045814~negative regulation of gene expression, epigenetic	6	0.676437	0.0920453	BMI1, MTF2, SPI1, HIST1H3D, RBBP7, HIST1H3G	811	50	16792	2.48464	1	0.99697	82.4965
GOTERM_MF_DIRECT	GO:0044325~ion channel binding	10	1.1274	0.0921617	KCNC1, TSPO, FYN, GRINA, PKD2, CAMK2D, AKAP9, FGF12, KCNG4, DLG1	809	113	16881	1.84659	1	0.961565	77.8933
GOTERM_MF_DIRECT	GO:0003690~double-stranded DNA binding	8	0.901917	0.0926407	SATB1, MTERF1, NUCKS1, SETMAR, TP63, PRKDC, MTERF4, HNRNPDL	809	81	16881	2.06089	1	0.957555	78.0747
GOTERM_BP_DIRECT	GO:0046330~positive regulation of JNK cascade	7	0.789177	0.0926816	LTBR, MYD88, CTGF, RASGRP1, GADD45G, GADD45B, TLR9	811	65	16792	2.2298	1	0.99675	82.7166
KEGG_PATHWAY	hsa04110:Cell cycle	10	1.1274	0.0927927	CDC7, E2F1, CCNB3, E2F4, CCND3, GADD45G, ORC5, PRKDC, GADD45B, WEE1	302	124	6879	1.83695	1	0.968699	71.7568
GOTERM_MF_DIRECT	GO:0050253~retinyl-palmitate esterase activity	2	0.225479	0.0934406	PLB1, PNPLA4	809	2	16881	20.8665	1	0.953961	78.3745
GOTERM_BP_DIRECT	GO:0090307~mitotic spindle assembly	5	0.563698	0.0936452	TUBGCP4, KIFC1, XIAP, MZT1, MAP9	811	36	16792	2.87574	1	0.996595	83.0449
GOTERM_BP_DIRECT	GO:0007147~female meiosis II	2	0.225479	0.0941504	DAZL, MASTL	811	2	16792	20.7053	1	0.996335	83.2146
GOTERM_BP_DIRECT	GO:0060977~coronary vasculature morphogenesis	2	0.225479	0.0941504	HEY2, SETD2	811	2	16792	20.7053	1	0.996335	83.2146
GOTERM_BP_DIRECT	GO:0086003~cardiac muscle cell contraction	2	0.225479	0.0941504	CAMK2D, SLC9A1	811	2	16792	20.7053	1	0.996335	83.2146
GOTERM_BP_DIRECT	GO:0035261~external genitalia morphogenesis	2	0.225479	0.0941504	NIPBL, LRP6	811	2	16792	20.7053	1	0.996335	83.2146
GOTERM_BP_DIRECT	GO:0061614~pri-miRNA transcription from RNA polymerase II promoter	2	0.225479	0.0941504	ETS1, FOSL1	811	2	16792	20.7053	1	0.996335	83.2146
GOTERM_BP_DIRECT	GO:1902622~regulation of neutrophil migration	2	0.225479	0.0941504	MYD88, RAC2	811	2	16792	20.7053	1	0.996335	83.2146
GOTERM_BP_DIRECT	GO:0070488~neutrophil aggregation	2	0.225479	0.0941504	S100A8, S100A9	811	2	16792	20.7053	1	0.996335	83.2146
GOTERM_MF_DIRECT	GO:0015386~potassium:proton antiporter activity	3	0.338219	0.0945246	SLC9A8, SLC9A6, SLC9A1	809	11	16881	5.69086	1	0.950805	78.7746
GOTERM_MF_DIRECT	GO:0019992~diacylglycerol binding	3	0.338219	0.0945246	RASGRP3, RASGRP4, RASGRP1	809	11	16881	5.69086	1	0.950805	78.7746
GOTERM_MF_DIRECT	GO:0050786~RAGE receptor binding	3	0.338219	0.0945246	S100A8, S100A9, S100A12	809	11	16881	5.69086	1	0.950805	78.7746
GOTERM_MF_DIRECT	GO:0003705~transcription factor activity, RNA polymerase II distal enhancer sequence-specific binding	7	0.789177	0.0953222	CEBPB, GATA6, SPI1, LEF1, POU4F1, SRF, USF2	809	66	16881	2.21311	1	0.947169	79.0646
GOTERM_BP_DIRECT	GO:0016569~covalent chromatin modification	10	1.1274	0.0955513	BMI1, CHD9, BRD3, SMARCD3, MTF2, CHD6, HLTF, HMGN5, TET1, SS18L1	811	113	16792	1.83233	1	0.996276	83.677
GOTERM_BP_DIRECT	GO:0070166~enamel mineralization	3	0.338219	0.0957895	PPARA, FAM20A, FOXO1	811	11	16792	5.6469	1	0.995944	83.7544
GOTERM_BP_DIRECT	GO:0060285~cilium-dependent cell motility	3	0.338219	0.0957895	CFAP44, DNAH17, DNAH8	811	11	16792	5.6469	1	0.995944	83.7544
GOTERM_BP_DIRECT	GO:0000185~activation of MAPKKK activity	3	0.338219	0.0957895	MAP4K3, GADD45G, GADD45B	811	11	16792	5.6469	1	0.995944	83.7544
KEGG_PATHWAY	hsa04668:TNF signaling pathway	9	1.01466	0.0959491	RPS6KA5, TNFRSF1B, CEBPB, SOCS3, CSF1, MMP9, RIPK3, CREB5, MMP14	302	107	6879	1.91592	1	0.956699	73.0063
GOTERM_BP_DIRECT	GO:0046835~carbohydrate phosphorylation	4	0.450958	0.0967943	GNPTAB, PFKFB3, HK3, PFKFB1	811	23	16792	3.60092	1	0.995792	84.0772
GOTERM_BP_DIRECT	GO:0050770~regulation of axonogenesis	4	0.450958	0.0967943	SSH3, ARHGAP35, KIF13B, SLIT3	811	23	16792	3.60092	1	0.995792	84.0772
GOTERM_BP_DIRECT	GO:0045087~innate immune response	28	3.15671	0.0975856	S100A8, FGR, CSF1, CLU, S100A9, GSDMD, PGLYRP1, FER, FES, APOBEC3C, TLR9, APOBEC3B, NLRC5, MYD88, CLEC4E, LILRA5, NLRP6, ITK, CR2, IL27, MSRB1, MALT1, S100A12, KLRG1, FYN, SLPI, NAIP, TREML1	811	430	16792	1.34825	1	0.995585	84.3271
